# Supplementary material for: Plasma Efavirenz Concentrations Are Associated With Lipid and Glucose Concentrations
Source: PubMed Central journal article supplement (PMC4718242; doi:10.1097/md.0000000000002385), 2016-01-15
Supplement: medi-95-e2385-s001.pdf [file medi-95-e2385-s001.pdf]

# PLASMA EFAVIRENZ CONCENTRATIONS ARE ASSOCIATED WITH LIPID AND GLUCOSE CONCENTRATIONS

Sinxadi et al

Bar graph displaying *CYP2B6* genotype frequencies in 57 South African adults

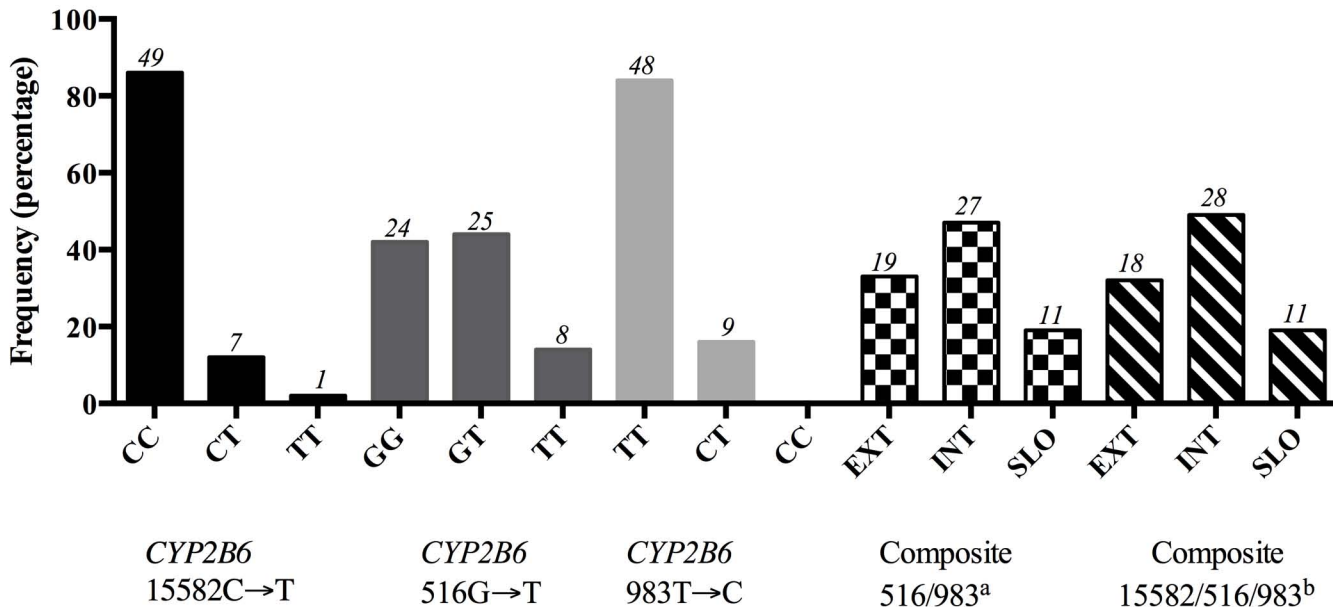

## Supplemental Figure 1. Bar graph displaying *CYP2B6* genotype frequencies in 57 South African adults.

The x-axis represents *CYP2B6* genotypes: 15582C→T (solid black), *CYP2B6* 516G→T (dark grey), 983T→C (light grey), composite 516/983 (black and white squares), and composite 15582/516/983 (black and white horizontal lines) genotypes. The composite genotypes were categorized into three levels; extensive metabolizer (EXT), intermediate metabolizer (INT) and slow metabolizer (SLO). The y-axis represents genotype frequencies in percentages. The number in italics at the top of each bar displays the absolute count. a Composite 516/983 were assigned as follows: EXT (516GG-983TT); INT (516GT-983TT or 516GG-983CT); and SLO (516TT-983TT, 516GT-983CT). b Composite 15582/516/983 were assigned as follows: EXT (15582CC-516GG-983TT or 15582CT-516GG-983TT); INT (15582TT-516GG-983TT, 15582CC-516GT-983TT, 15582CC-516GG-983CT, 15582CT-516GT-983TT, or 15582CT-516GG-983CT); and SLO (15582CC-516TT-983TT, 15582CC-516GT-983CT).

**PLASMA EFAVIRENZ CONCENTRATIONS ARE ASSOCIATED WITH LIPID AND GLUCOSE CONCENTRATIONS**

Sinxadi et al.

**Supplemental Table 1. Multivariate linear regression analyses (each adjusted for age, body mass index, total duration on ART and current stavudine use) between  $\log_{10}$  transformed efavirenz mid-dosing interval concentrations and each metabolic parameter (N=106)**

| <b>Outcome variable</b> | <b><math>\beta</math> (95%CI)</b> | <b>*Mean change (95% CI) per doubling of efavirenz concentrations (mmol/L)</b> | <b>p-value</b> |
|-------------------------|-----------------------------------|--------------------------------------------------------------------------------|----------------|
| Total cholesterol       | 1.31 (0.70 to 1.93)               | 0.39 (0.21 to 0.58)                                                            | 0.000          |
| LDL cholesterol         | 0.60 (0.12 to 1.08)               | 0.18 (0.04 to 0.32)                                                            | 0.015          |
| HDL cholesterol         | 0.45 (0.23 to 0.67)               | 0.14 (0.07 to 0.20)                                                            | 0.000          |
| Triglycerides           | 0.59 (0.09 to 1.09)               | 0.18 (0.03 to 0.33)                                                            | 0.020          |
| Fasting glucose         | 0.59 (0.08 to 1.09)               | 0.18 (0.02 to 0.33)                                                            | 0.023          |
| 2-hour glucose          | 1.10 (0.21 to 1.99)               | 0.33 (0.06 to 0.60)                                                            | 0.016          |

ART= antiretroviral therapy, [N = total number of the study population](#), LDL= low-density lipoprotein, HDL = high-density lipoprotein. \*Mean change (95%CI) in lipid and glucose concentrations (in mmol/L) with doubling of efavirenz concentrations. The mean changes are calculated using the formula  $Y = \beta * \log_{10}(2)$ , where  $\beta$  is the beta coefficient for the  $\log_{10}$  transformed efavirenz concentrations as the independent variable in linear regression analyses for the various metabolic outcomes.
